# Supplementary material for: H. pylori modulates DC functions via T4SS/TNFα/p38-dependent SOCS3 expression
Source: PubMed Central journal article supplement (PMC7541176; doi:10.1186/s12964-020-00655-1), 2020-10-06
Supplement: 12964_2020_655_MOESM2_ESM.pdf [file 12964_2020_655_MOESM2_ESM.pdf]

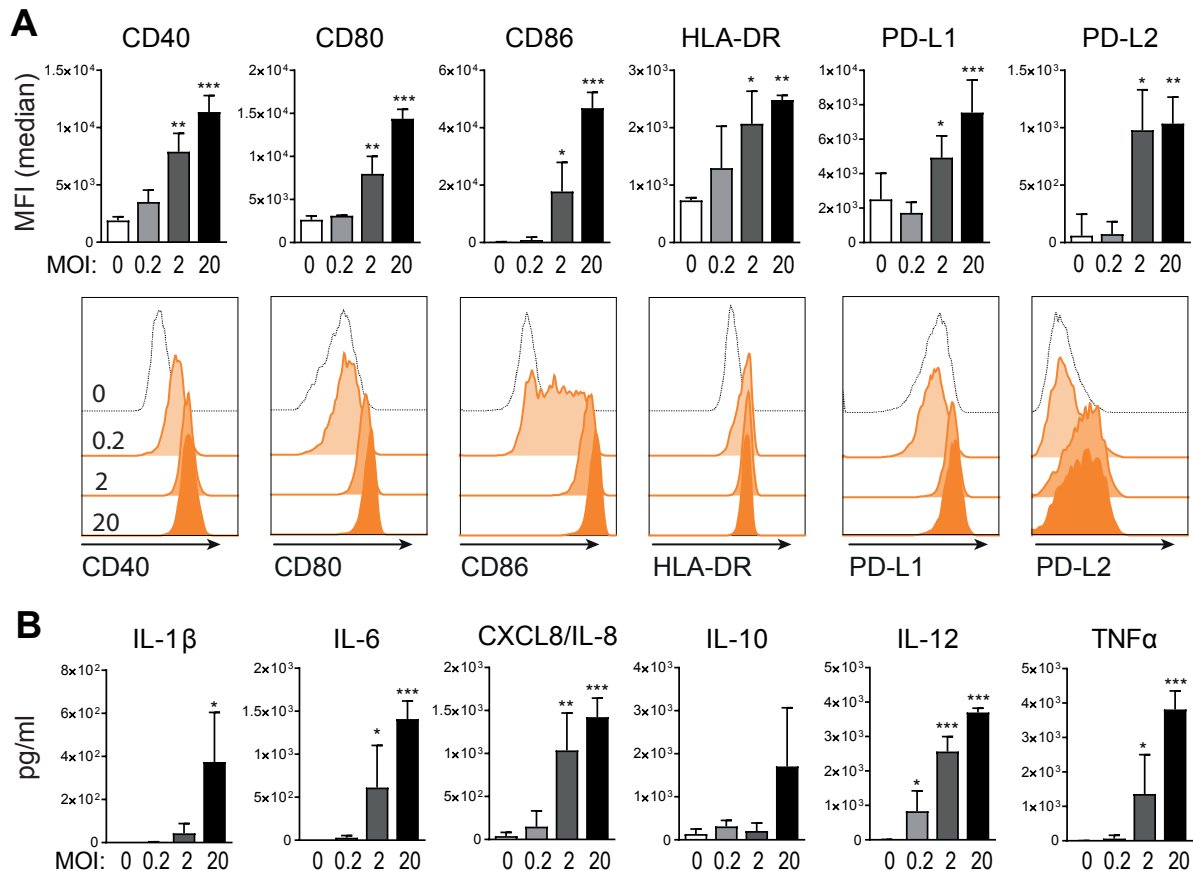

**Supplementary Figure 1. *H. pylori* induces maturation of human DCs.** Monocytes were isolated from human PBMCs and differentiated into moDCs in the presence of IL-4 and GM-CSF (50 ng/mL each). Immature DCs were re-plated in fresh medium on day 7, *H. pylori* strain P12 was harvested in PBS and added to the cells at increasing MOIs of 0.2, 2 and 20. Surface marker expression (A) and cytokine secretion (B) were analyzed 48 hours post-infection. Data represent mean+SD of one experiment comprising three individual donors (N=3). For statistical analysis, one-way ANOVA with Dunnett's post-hoc test was performed. \*p<0.05, \*\*p<0.01, \*\*\*p<0.001

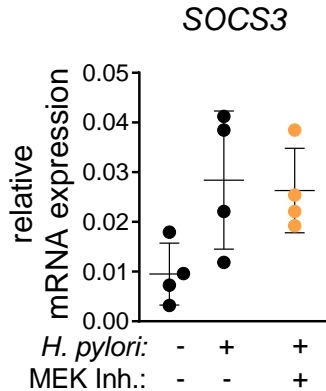

**Supplementary Figure 2. *H. pylori*-induced *SOCS3* expression is independent of MEK signaling.** Cells were treated with a specific inhibitor of MEK kinase 20 minutes prior to infection with *H. pylori* wild-type strain P12 (MOI=5). After 1 hour of infection, DCs were harvested and *SOCS3* mRNA expression was analyzed by qRT-PCR. Two experiments comprising 4 donors (N=4) are shown. For statistical analysis, one-way ANOVA with Tukey's post-hoc test was performed. \*p<0.05, \*\*p<0.01

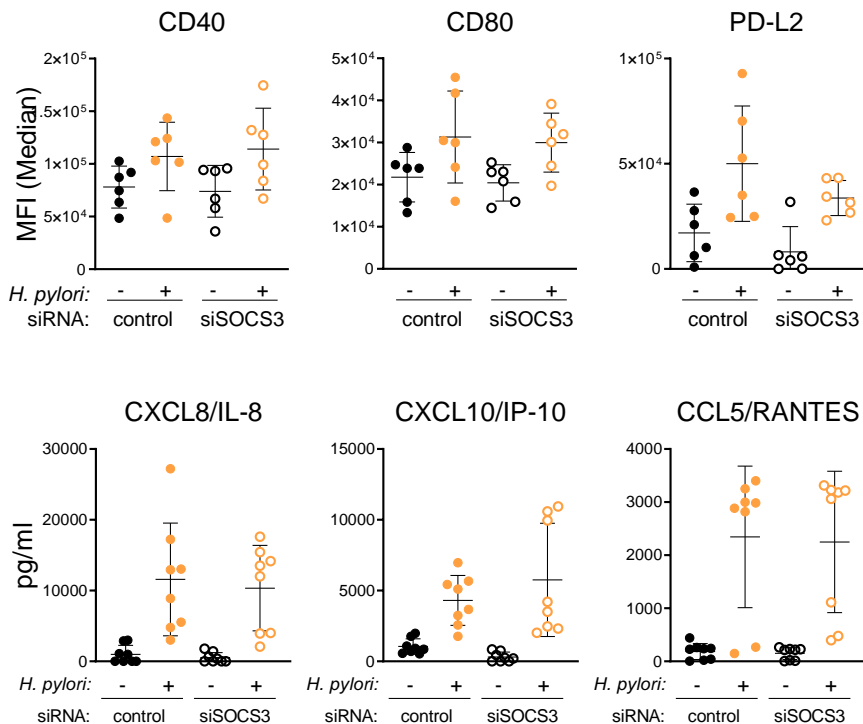

**Supplementary Figure 3. SOCS3 silencing does not affect chemokine secretion.** Immature day-7 DCs were re-plated and transfected with siRNA targeting *SOCS3* or non-targeting control oligo (both 100 pmol). 48 hours post-transfection, *H. pylori* strain P12 was harvested in PBS and added to the cells at MOI = 5. Surface marker expression (A) and chemokine secretion (B) were analyzed 24 hours after bacterial infection. Three experiments comprising eight donors are shown. Dots represent individual donors; mean  $\pm$  SD is shown.

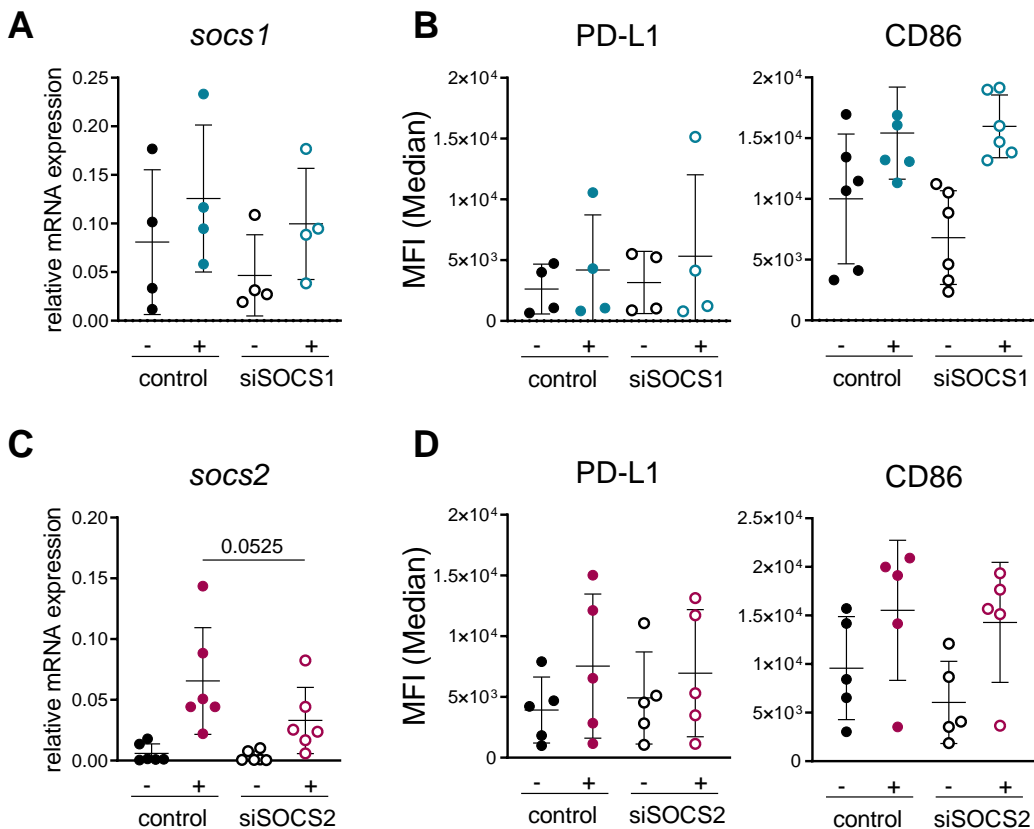

**Supplementary Figure 4. *SOCS1* and *SOCS2* silencing do not significantly alter DC activation.**

Immature day-7 DCs were re-plated and transfected with siRNA targeting *SOCS1* (50-100 pmol), *SOCS2* (100 pmol) or non-targeting control oligo (100 pmol). 48 hours post-transfection, *H. pylori* strain P12 was harvested in PBS and added to the cells at MOI = 5. (A,C) Silencing efficiency was analyzed by qRT-PCR after 8 hours of infection. (B,D) Surface marker expression was analyzed 24 hours after bacterial infection. Three experiments comprising four donors (N=4) (A,B) and three experiments comprising five donors (N=5) (C,D) are shown. Dots represent individual donors; mean  $\pm$  SD is shown. For statistical analysis, one-way ANOVA with Tukey's post-hoc test was performed. \* $p < 0.05$ , \*\* $p < 0.01$
